# Supplementary material
Source: publisher figshare collection journal article supplement (https://acs.figshare.com/ndownloader/files/26043835)
Supplement: Supplementary file 1 [file 26043835]

# **Cellular engineering and biocatalysis strategies toward sustainable cadaverine production: State of the art and perspectives**

*Jiali Mi<sup>†,‡</sup>, Simin Liu<sup>†,‡</sup>, Haishan Qi<sup>\*,†,‡</sup>, Jie Huang<sup>†,‡</sup>, Xiang Lan<sup>†,‡</sup>, Lei Zhang<sup>†,‡</sup>*

<sup>†</sup>Department of Biochemical Engineering, School of Chemical Engineering and Technology, Tianjin University, No.135, Yaguan Road, Tianjin 300072, P.R. China.

<sup>‡</sup> School of Chemical Engineering and Technology, Frontier Science Center for Synthetic Biology and Key Laboratory of Systems Bioengineering (MOE), Tianjin University, No.135, Yaguan Road, Tianjin 300350, P. R. China.

\*Corresponding author:

Haishan Qi, e-mail: [hsqi@tju.edu.cn](mailto:hsqi@tju.edu.cn).

**Table S1** Comparison of the mechanical properties of petrochemical PA 6, PA 66 and bio-based PA 510.

| Property                                         | Pure |       |        |
|--------------------------------------------------|------|-------|--------|
|                                                  | PA 6 | PA 66 | PA 510 |
| Bio-based content [%]                            | 0    | 0     | 100    |
| Viscosity number [mL g <sup>-1</sup> ]           | 150  | 150   | 141    |
| Melting point [°C]                               | 220  | 260   | 215    |
| Glass transition temperature [°C]                | 54   | 60    | 50     |
| Density [g cm <sup>-3</sup> ]                    | 1.14 | 1.14  | 1.07   |
| Water absorption [%]                             | 3    | 2.8   | 1.8    |
| Haze                                             | 102  | 102   | 64     |
| <b>30% glass fiber content (by 23 °C dry)</b>    |      |       |        |
| Tensile strength [MPa]                           | 179  | 188   | 155    |
| Elongation at break [%]                          | 3.8  | 3.7   | 3.9    |
| E-modulus [MPa]                                  | 9424 | 9586  | 8310   |
| Impact strength, notched [kJ m <sup>-2</sup> ]   | 15   | 10    | 12     |
| Impact strength, unnotched [kJ m <sup>-2</sup> ] | 99   | 83    | 86     |

Data from previously published paper.<sup>20</sup>

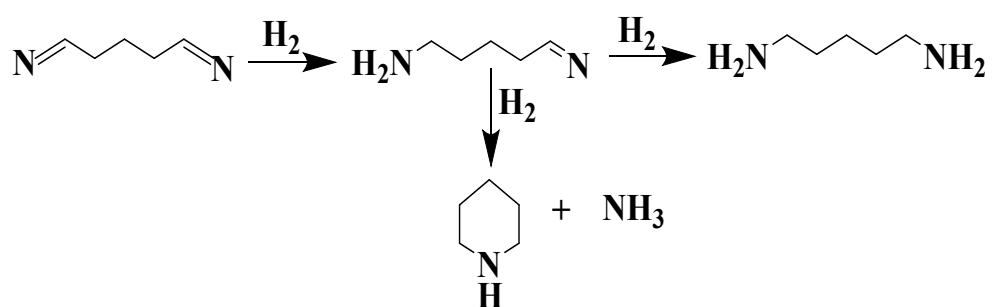

**Figure S1.** Cadaverine synthesis with glutaronitrile hydrogenation.

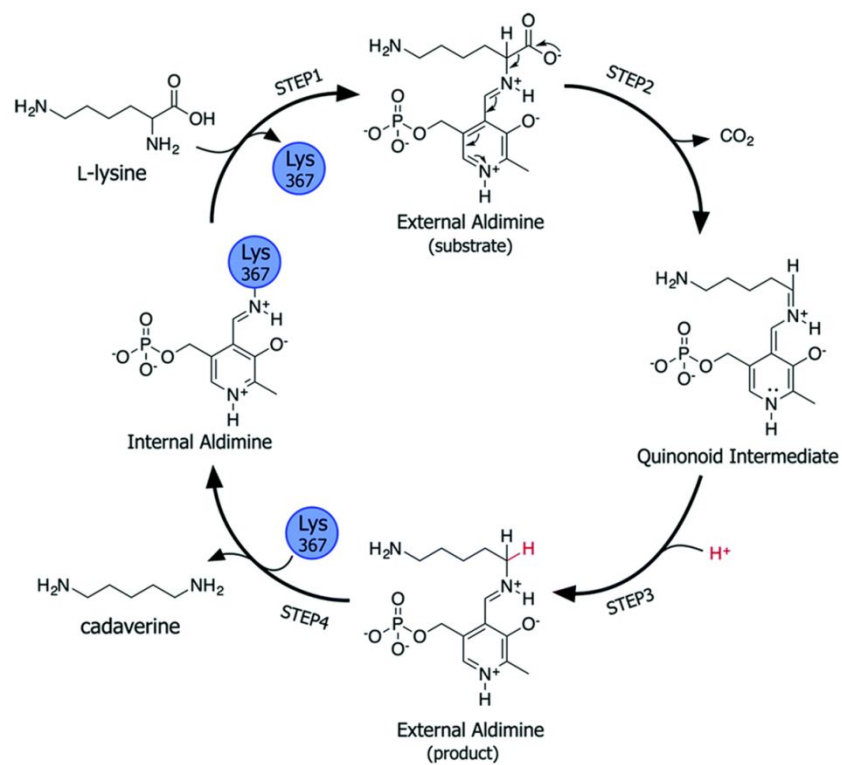

**Figure S2.** The suggested mechanism for lysine decarboxylase.
